# Supplementary material for: Caveolin induced membrane curvature and lipid clustering: two sides of the same coin?
Source: Royal Society of Chemistry journal article supplement (doi:10.1039/d0fd00062k), 2020-09-17
Supplement: d0fd00062k1.pdf [file d0fd00062k1.pdf]

# **Caveolin Induced Membrane Curvature and Lipid Clustering: Two Sides of the Same Coin?**

Shikha Prakash,<sup>†,‡</sup> Anjali Krishna,<sup>†,‡</sup> and Durba Sengupta<sup>\*,†</sup>

<sup>†</sup>*National Chemical Laboratory, Council of Scientific and Industrial Research, Dr. Homi Bhabha Road, Pune 411008, India*

<sup>‡</sup>*Contributed equally to this work*

E-mail: d.sengupta@ncl.res.in



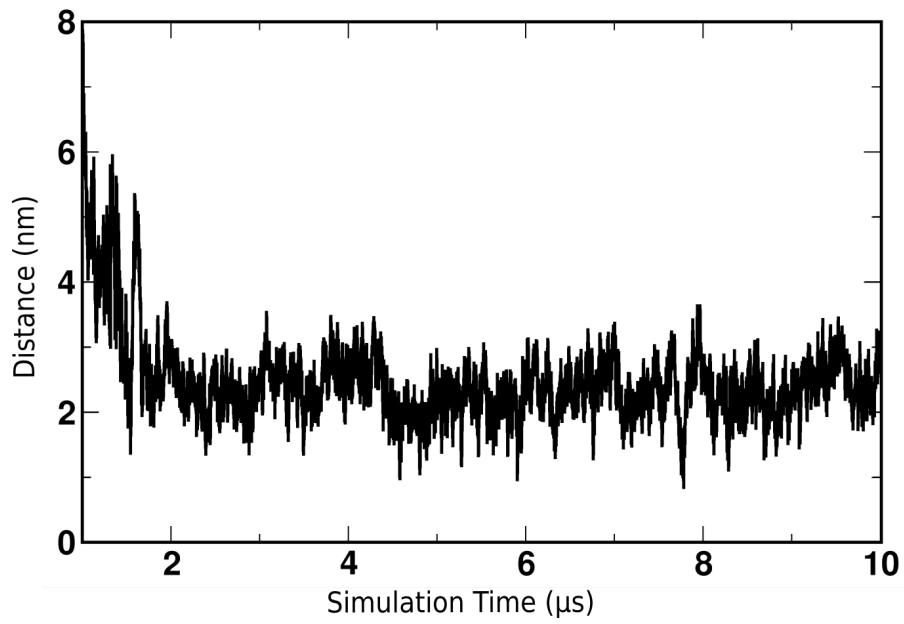

Figure 2: The average depth of insertion and inter-helical angle of the IMD during the course of the simulations.

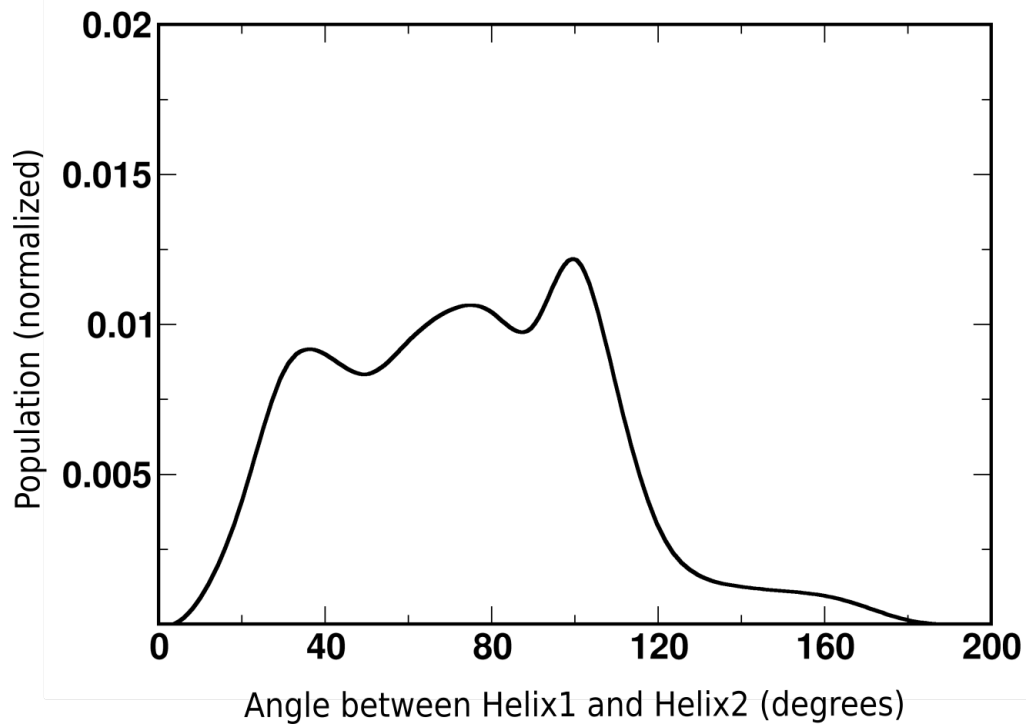

Figure 3: The inter-helical angle between the two helices in the IMD. The normalized population density is calculated from the bound regime in all three simulation sets. The smaller values represent compact conformations and the larger values correspond to open 'banana' shaped conformers.

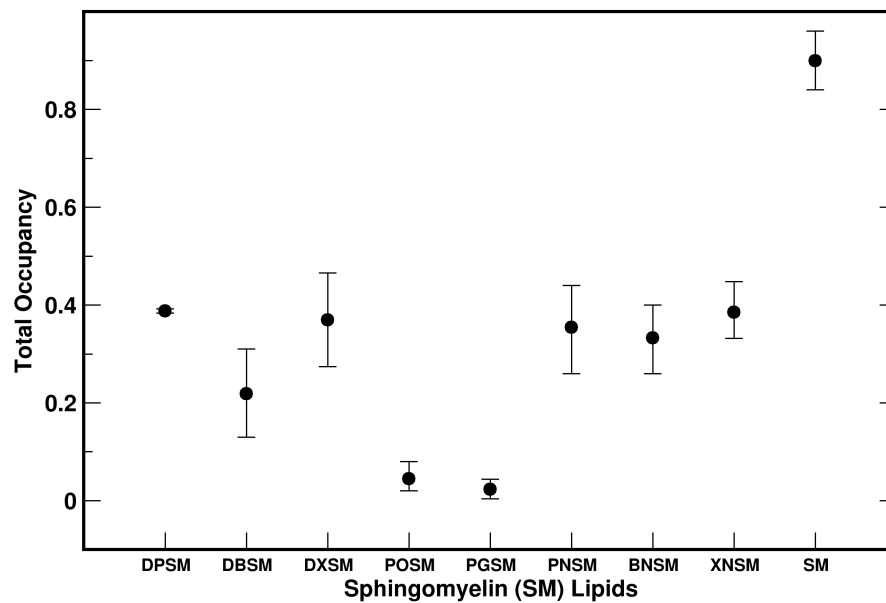

Figure 4: The total occupancy time of cav-1 (as a whole) and different SM lipid types (individually and considered together). The occupancy time is calculated as defined in the Methods section.
